# Supplementary material for: Photo-driven near-IR fluorescence switch: synthesis and spectroscopic investigation of squarine-spiropyran dyad
Source: Royal Society of Chemistry journal article supplement (doi:10.1039/c5ra20252c), 2015-01-01
Supplement: c5ra20252c1.pdf [file c5ra20252c1.pdf]

## Electronic Supplementary Material (ESI)

# Photo-driven Near-IR Fluorescence Switch: Synthesis and Spectroscopic Investigation of Squarine-Spiropyran Dyad

*Siva Doddi, Bheerappagari Ramakrishna, Yeduru Venkatesh<sup>§</sup>, and Prakriti  
Ranjan Bangal<sup>§\*</sup>*

Inorganic and Physical Chemistry Division

Indian Institute of Chemical Technology

Uppal Road, Tarnaka, Hyderabad, India-500607

Fax: (+91)40-27160921); Tel :(+91)40-27191431)

*E-mail: prakriti@iict.res.in*

<sup>§</sup>Academy of Scientific and Innovative Research (AcSIR), New Delhi

## **Content:**

1. Absorption spectra of **SP (6)** and Absorption and fluorescence emission spectra of corresponding **MC** form of **SP (6)** in ACN.
2. Absorption spectra of **SP (6)** and Absorption and fluorescence emission spectra of corresponding **MC** form of **SP (6)** in film.
3. Concentration dependent absorbance **SP-SQ-SP (7)** and **SQ (3)** in ACN solvent.
4. Absorption spectra of **SP-SQ-SP (7)** in ACN solution before and after UV irradiation at room temperature (300K).
5. Concentration dependent fluorescence **SP-SQ-SP (7)** and **SQ (3)** in ACN solvent.
6. Absorption and fluorescence emission spectra of **SQ (3)** in ACN.
7. Fluorescence spectra of **SP-SQ-SP (7)** nanoparticles in H<sub>2</sub>O.
8. SEM micrograph and DSL size distribution of **SP-SQ-SP (7)** nanoparticles.
9. <sup>1</sup>H NMR spectra of **SQ (3)**
10. FT-IR Spectra of **SQ(3)**
11. <sup>1</sup>H NMR spectra of **SP-SQ-SP (7)**
12. <sup>13</sup>C NMR spectra of **SP-SQ-SP (7)**
13. FT-IR spectra of **SP-SQ-SP (7)**
14. FT-IR spectra of **SP-COOH**
15. HRMS spectra of **SP-SQ-SP (7)**

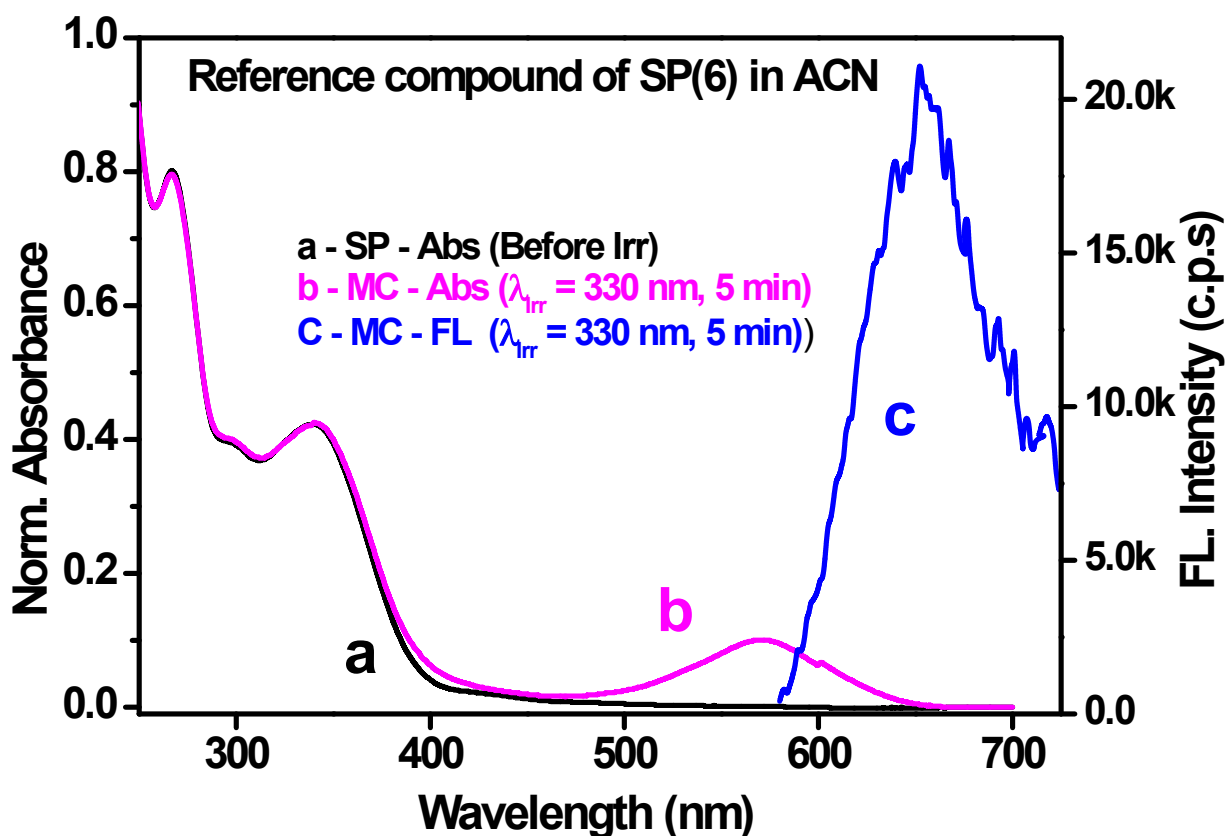

**Figure 1S.** (a) Black colour curve, absorption spectra of **SP(6)** in ACN, (b) magenta colour curve, absorption spectra of **SP** after UV irradiation ( $\lambda_{irr} = 330$  nm) for 5 minutes, effectively shows the absorption spectra of MC form of **SP(6)** in ACN, (c) blue colour curve, fluorescence emission spectra of **SP** after UV irradiation ( $\lambda_{irr} = 330$  nm) for 5 minutes in ACN, effectively shows the emission spectra of **MC** form of **SP** in ACN, Emission spectra was collected on excitation at 580 nm.

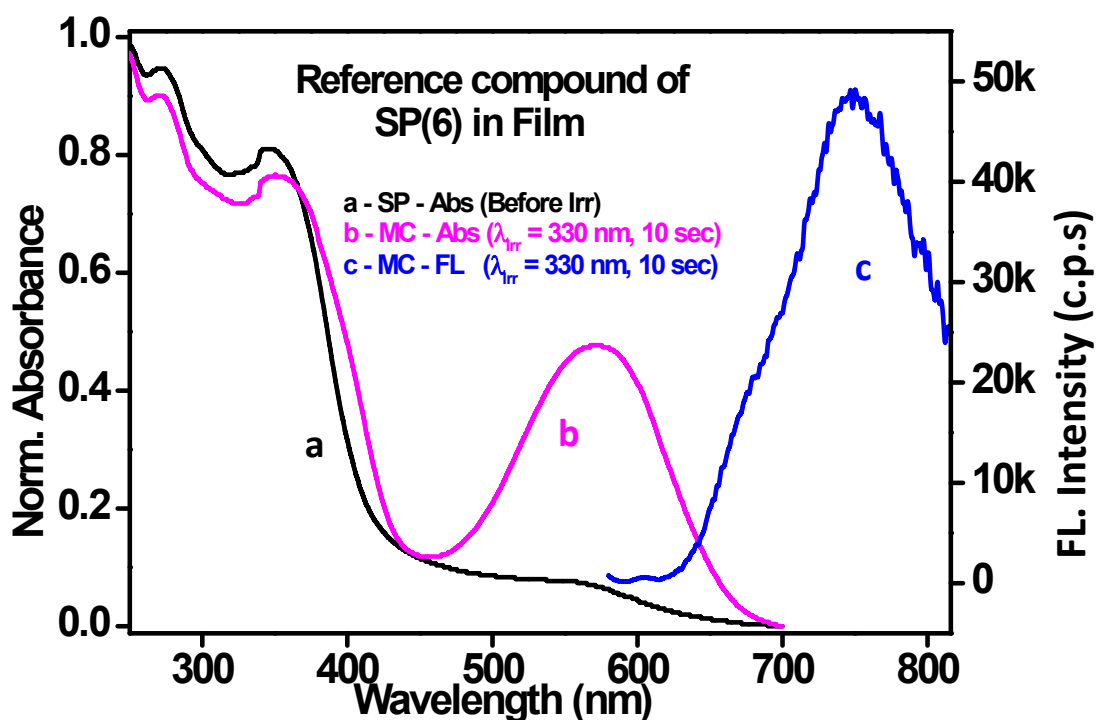

**Figure 2S:** (a) Black colour curve, absorption spectra of SP(6) in film, (b) magenta colour curve, absorption spectra of SP after UV irradiation ( $\lambda_{irr} = 330$  nm) for 10 seconds, effectively shows the absorption spectra of MC form of SP film, (c) blue colour curve, fluorescence emission spectra of SP after UV irradiation ( $\lambda_{irr} = 330$  nm) for 10 seconds in film, effectively shows the emission spectra of MC form of SP film, Emission spectra was collected on excitation at 600 nm.

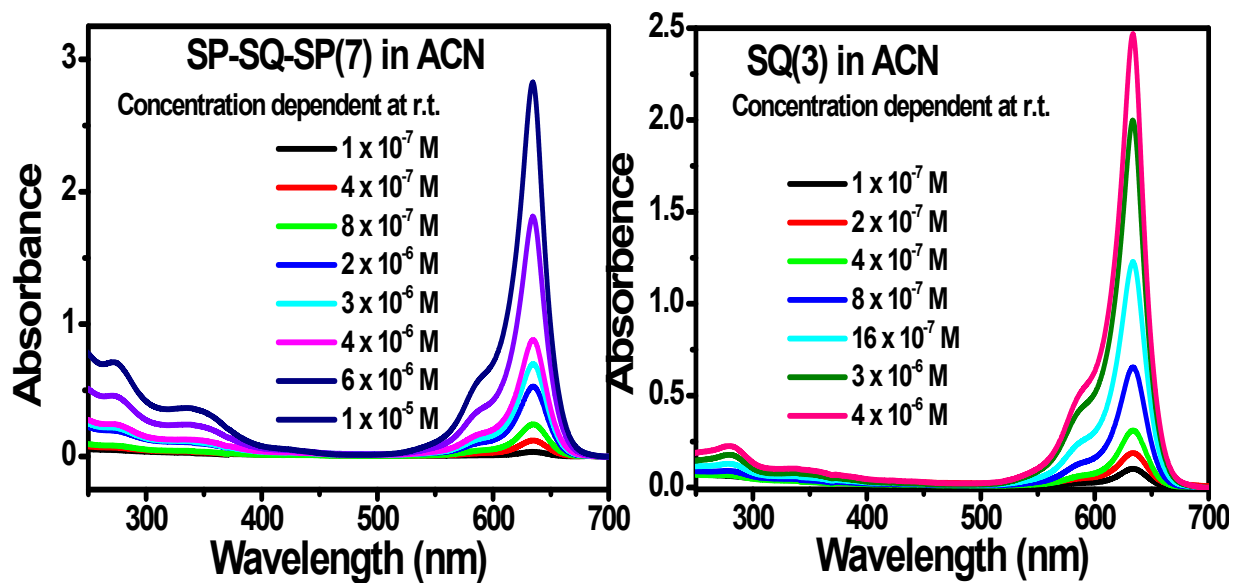

**Figure 3S:** Concentration dependent absorbance SP-SQ-SP(7) and SQ(3) in ACN solvent.

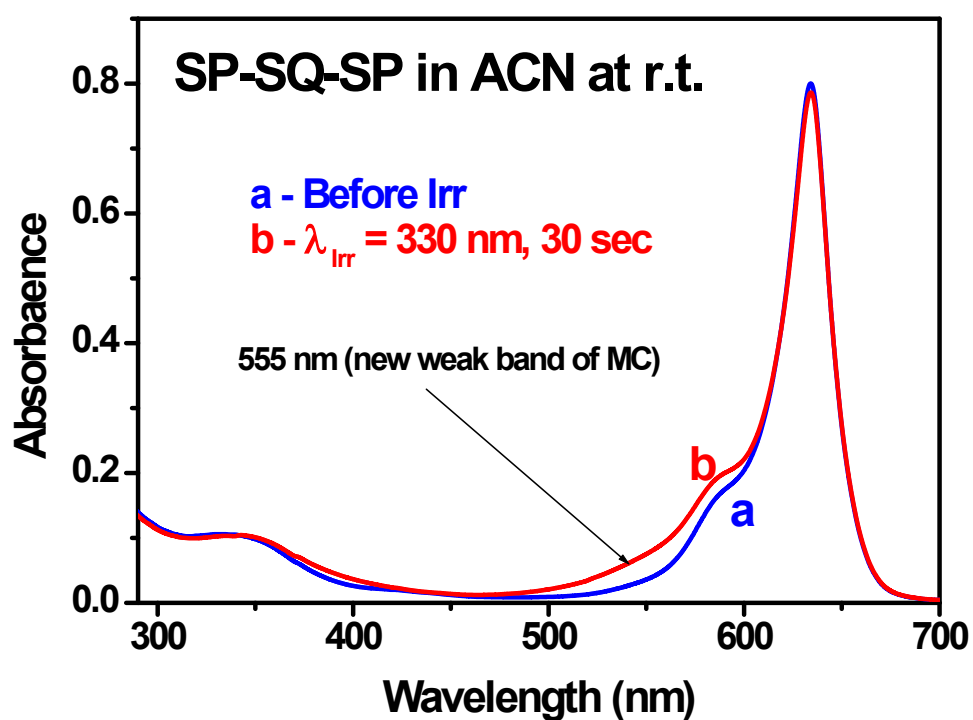

**Figure 4S:** Absorption spectra of SP-SQ-SP (7) in ACN solution before and after UV irradiation at room temperature (300K).

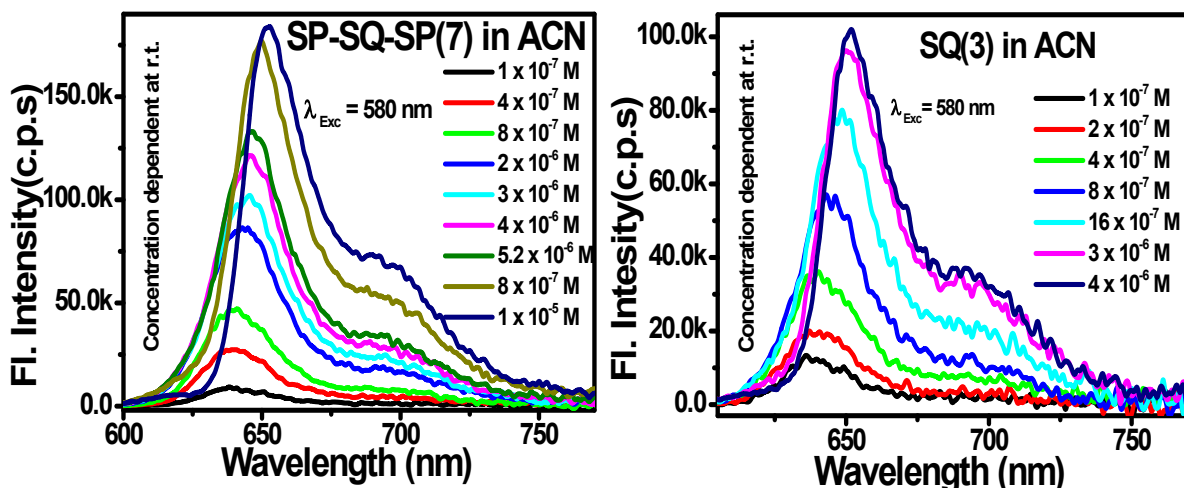

**Figure 5S:** Concentration dependent fluorescence **SP-SQ-SP (7)** and **SQ (3)** in ACN solvent.

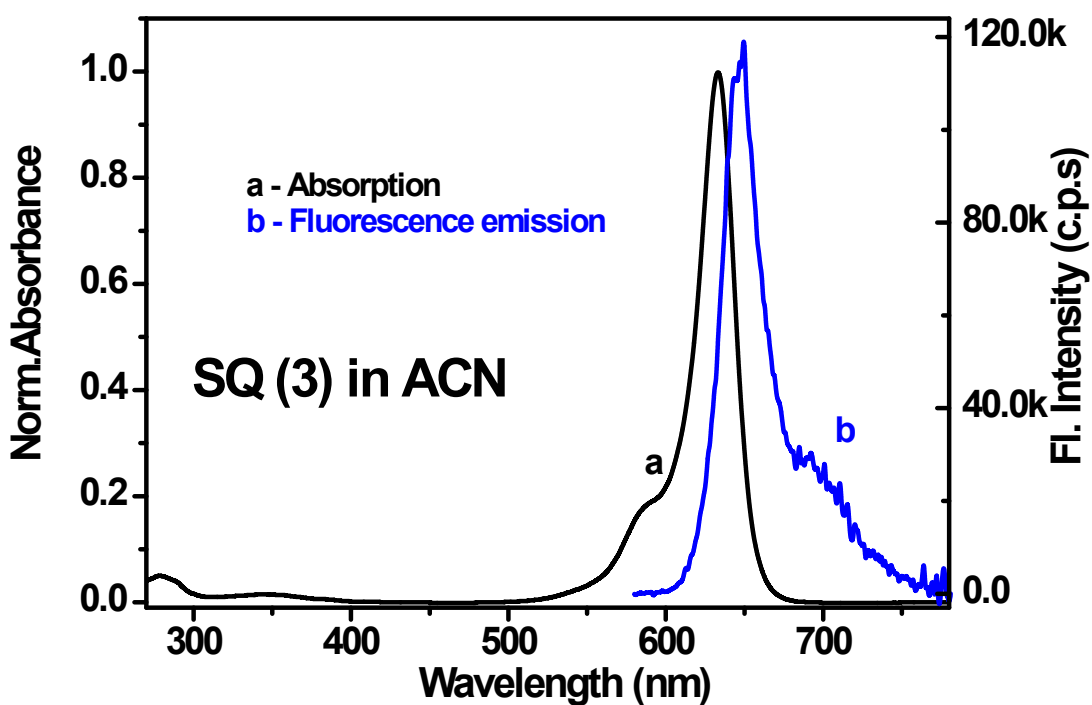

**Figure 6SA:** (a) Black colour curve, absorption spectra of **SQ(3)** in ACN. (b) Blue colour curve, fluorescence emission spectra of **SQ(3)** ( $\lambda_{Ex} = 600\text{nm}$ ).

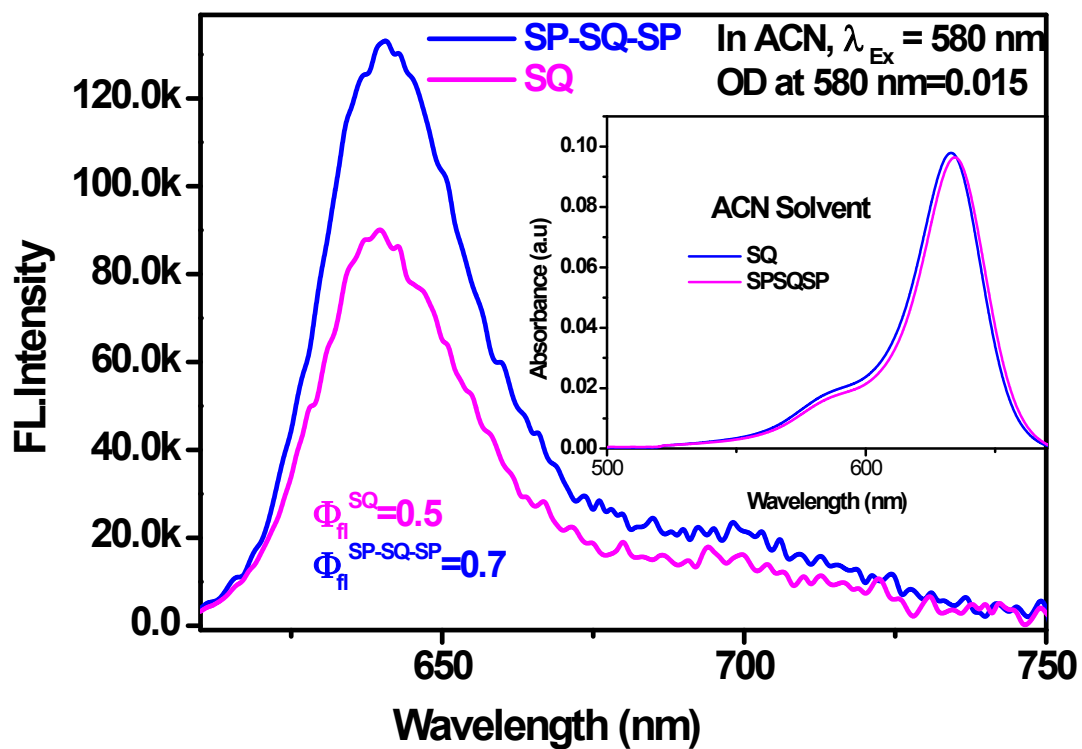

**Figure 6SB:** Relative fluorescence intensity of SQ and SP-SQ-SP when excited at 580 nm keeping nearly equal absorbance for both the compounds. Inset shows the absorption spectra of SQ and SP-SQ-SP of nearly equal absorbance.

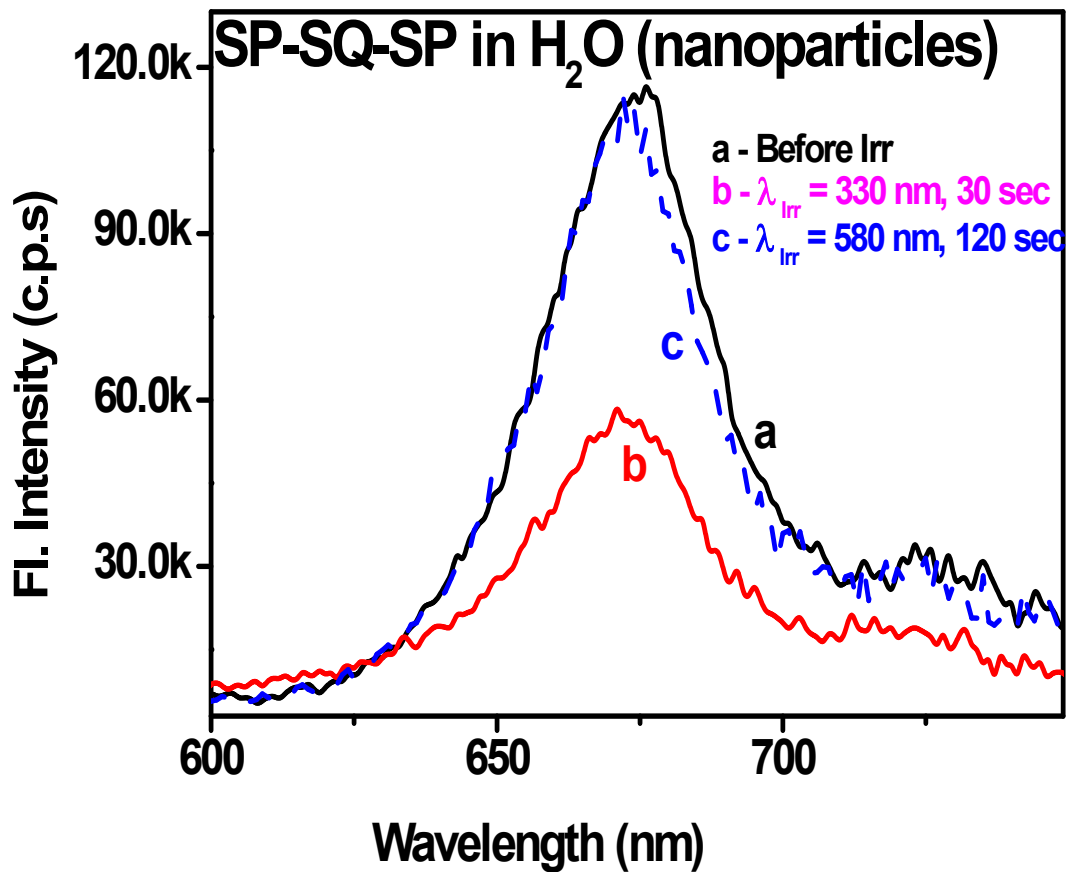

**Figure 7S:** Fluorescence switching behaviour of **SP-SQ-SP(7)** nanoparticles dispersed in aqueous medium.



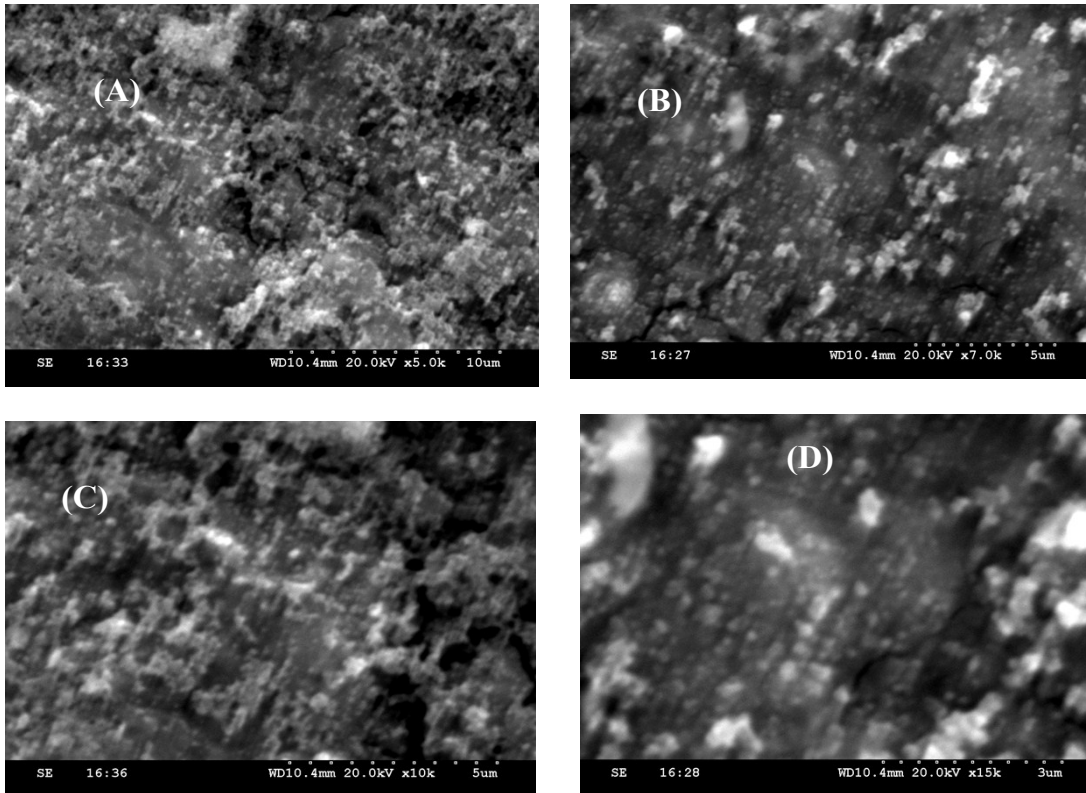

**Figure 8SA:** SEM image of as prepared nanoparticles of **SP-SQ-SP(7)** shown in different magnifications (A) 5K, (B) 7K, (C) 10 K and (D) 15 K. Estimated size of the nanoparticles is <100 nm.

|                                                 | Size (r.nm):         | % Number | Width |
|-------------------------------------------------|----------------------|----------|-------|
| <b>Z-Average (r.nm):</b> 839.0                  | <b>Peak 1:</b> 61.54 | 99.6     | 11.81 |
| <b>Pdl:</b> 1.000                               | <b>Peak 2:</b> 1195  | 0.4      | 323.2 |
| <b>Intercept:</b> 0.693                         | <b>Peak 3:</b> 0.000 | 0.0      | 0.000 |
| <b>Result quality :</b> Refer to quality report |                      |          |       |

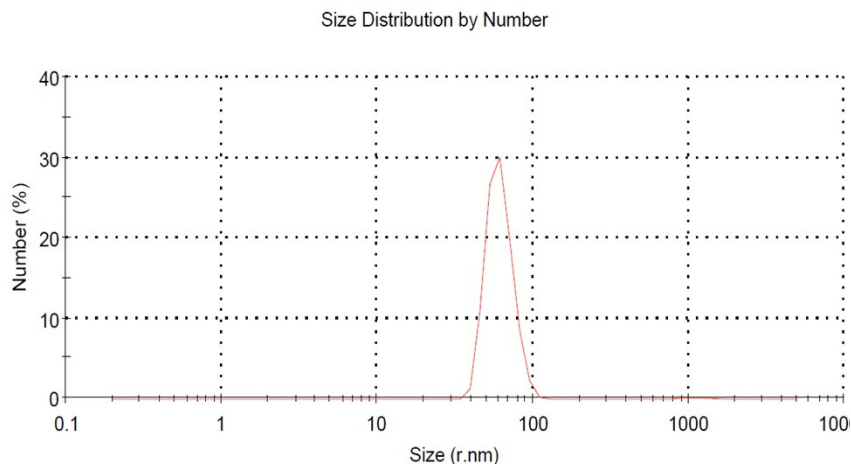

**Figure 8SB:** Size distribution of as prepared nanoparticles of **SP-SQ-SP(7)** dispersed in water observed in DLS

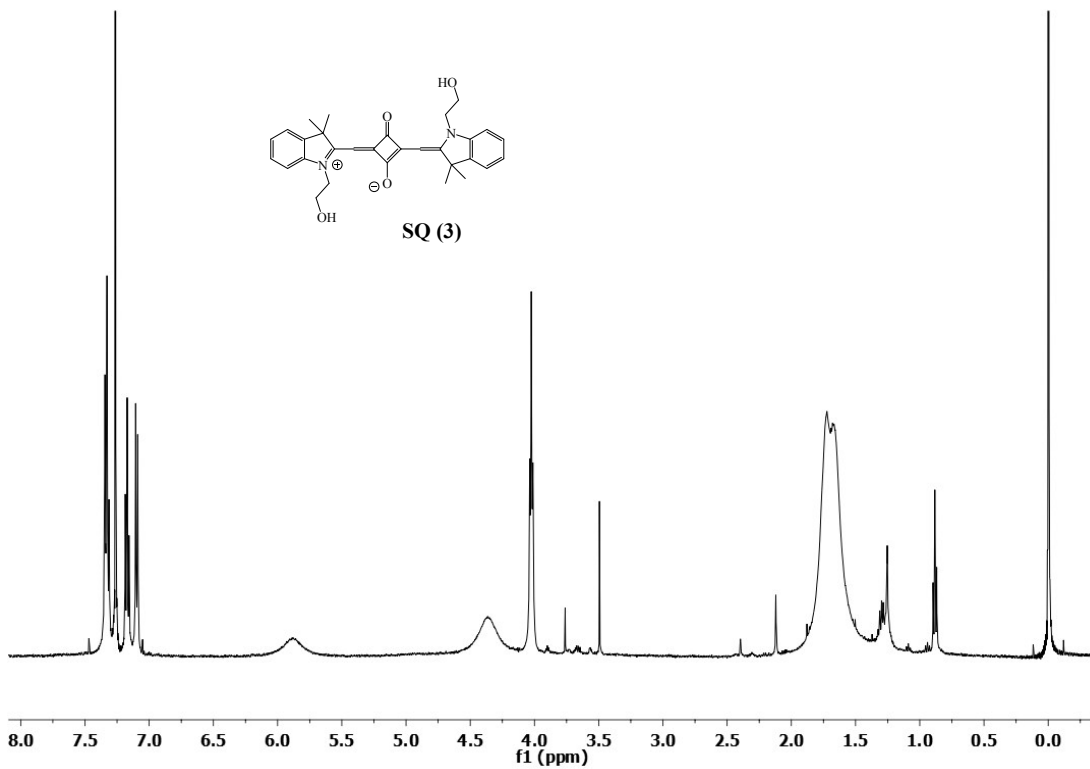

**Figure 9S: S1:**  $^1\text{H}$  NMR spectra of SQ (3)

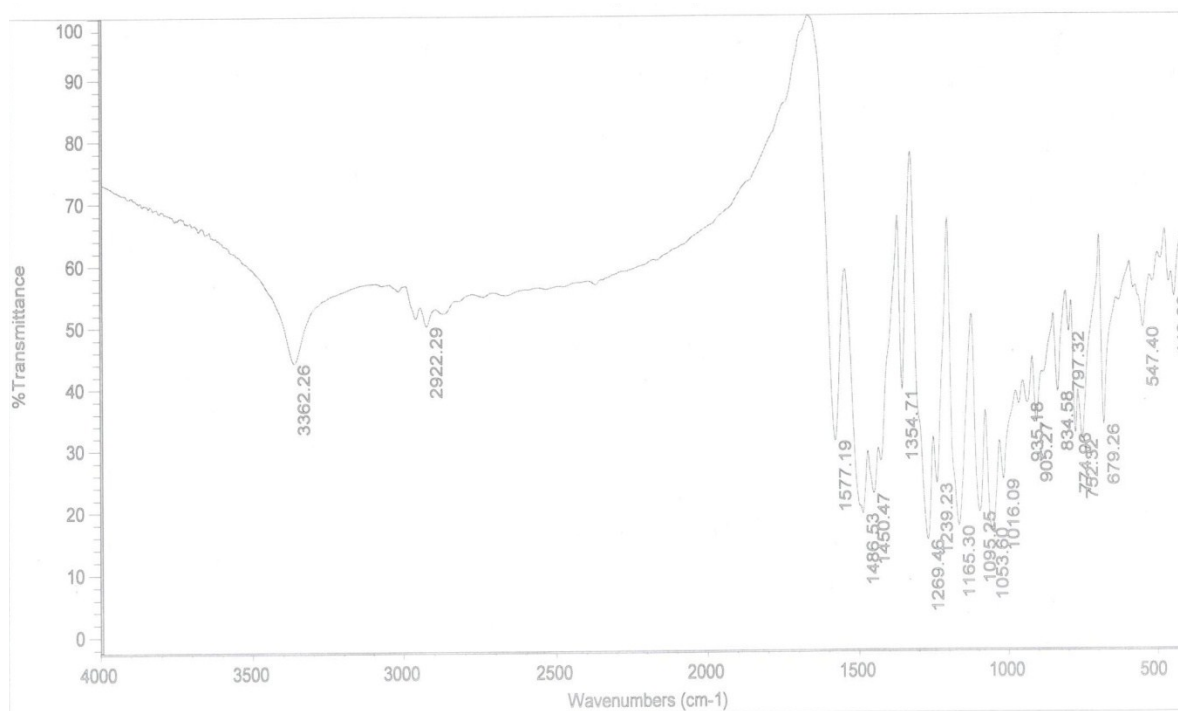

**Figure 10S:** FT-IR Spectra of SQ(3)

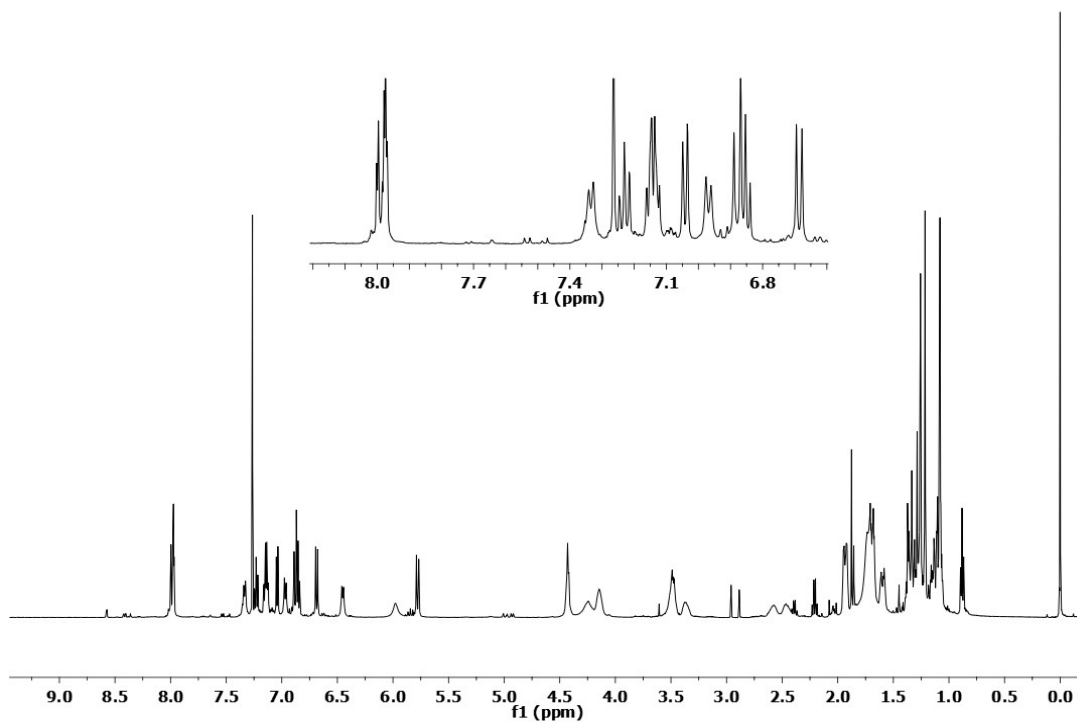

**Figure 11S:**  $^1\text{H}$  NMR spectra of SP-SQ-SP (7)

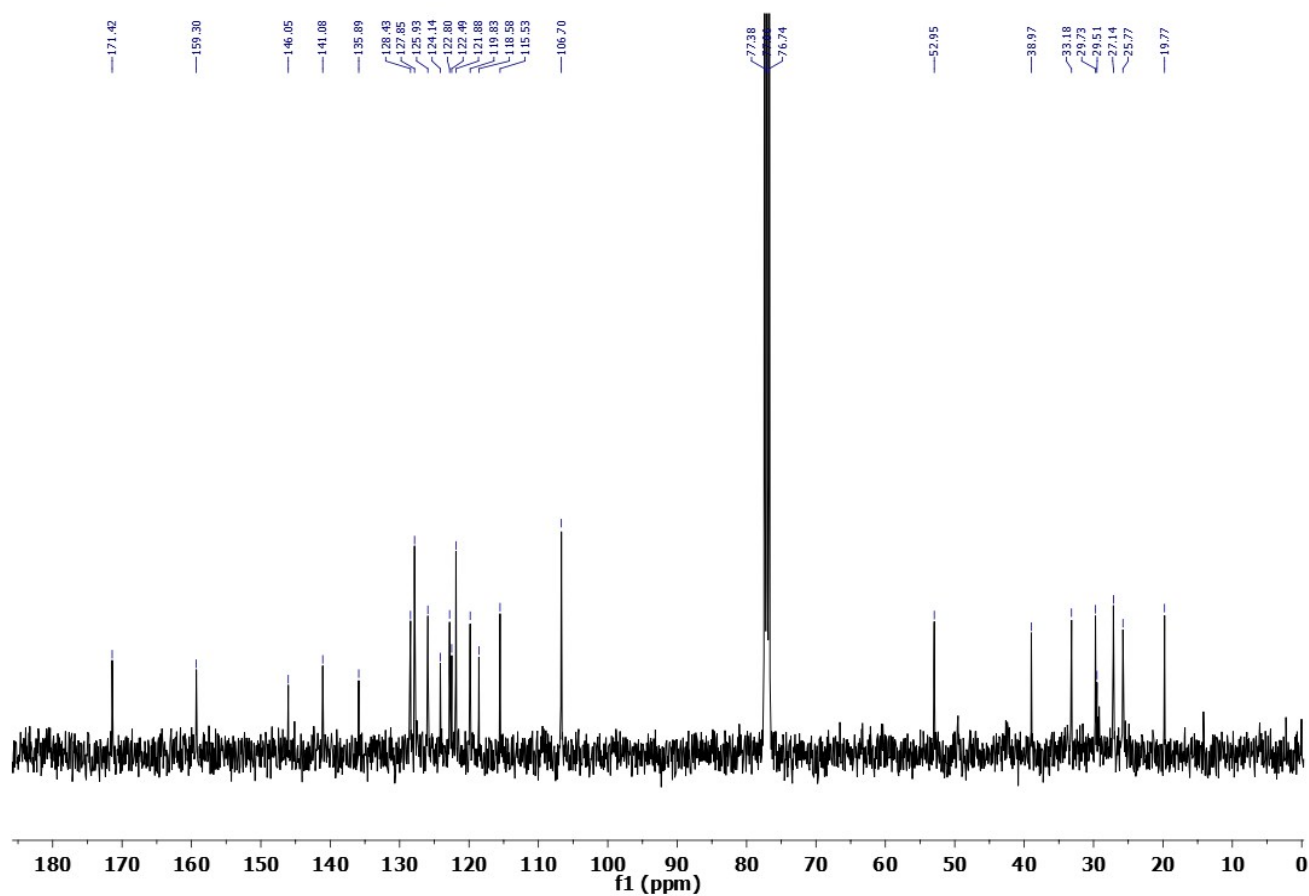

**Figure 12S:**  $^{13}\text{C}$  NMR spectra of SP-SQ-SP (7)

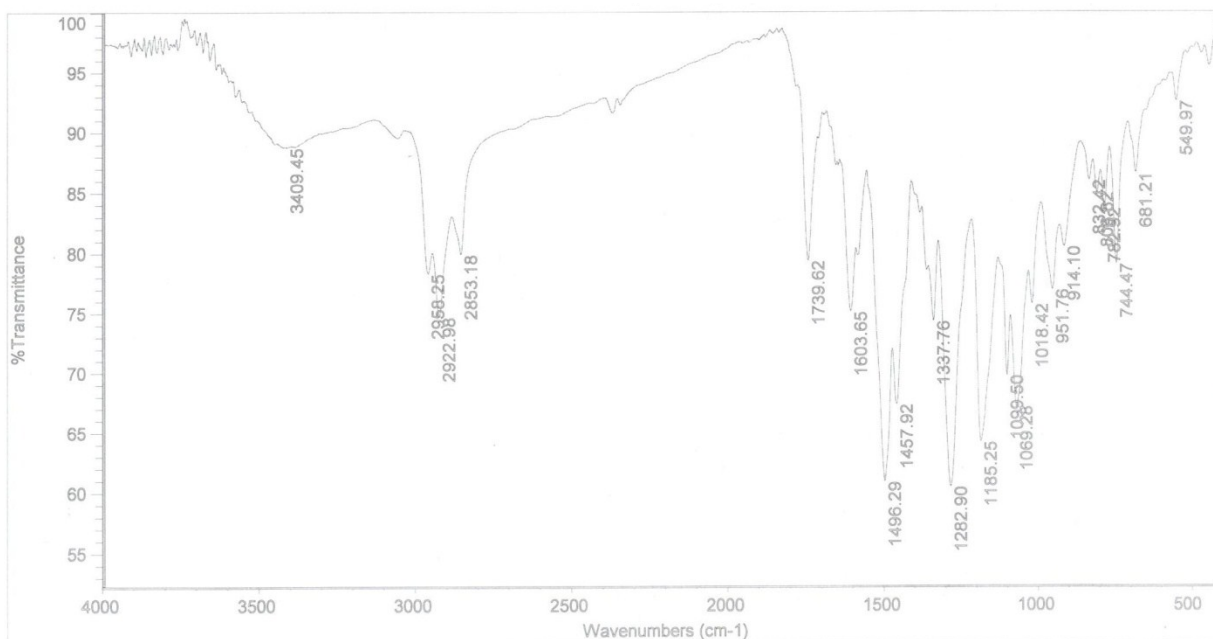

**Figure 13S: FT-IR spectra of SP-SQ-SP (7)**

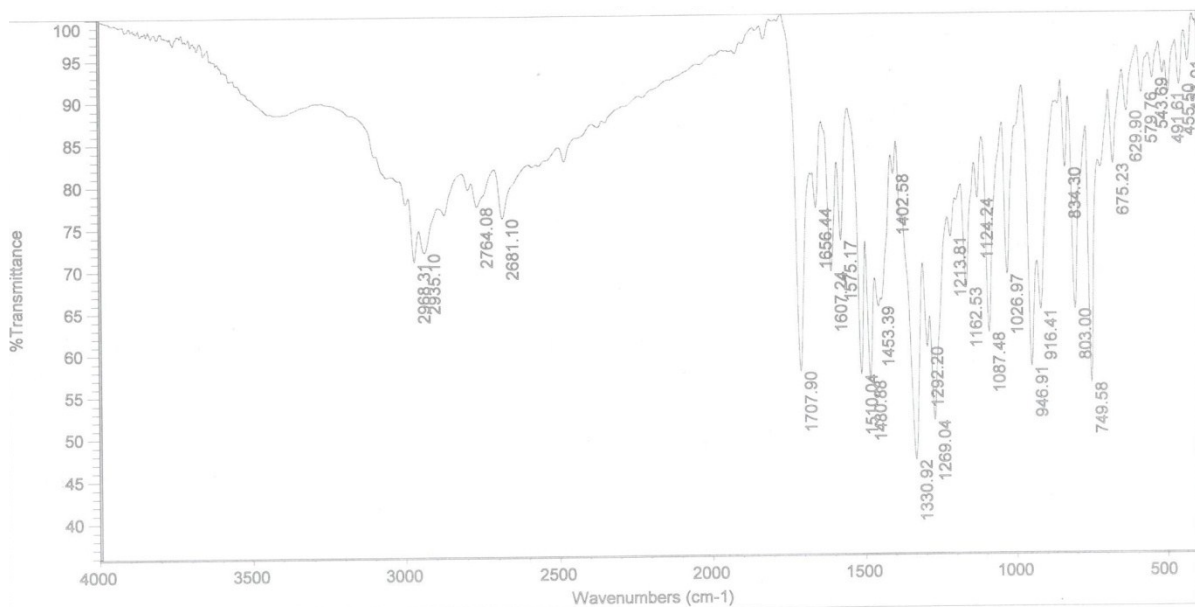

**Figure 14S: FT-IR spectra of SP-COOH**

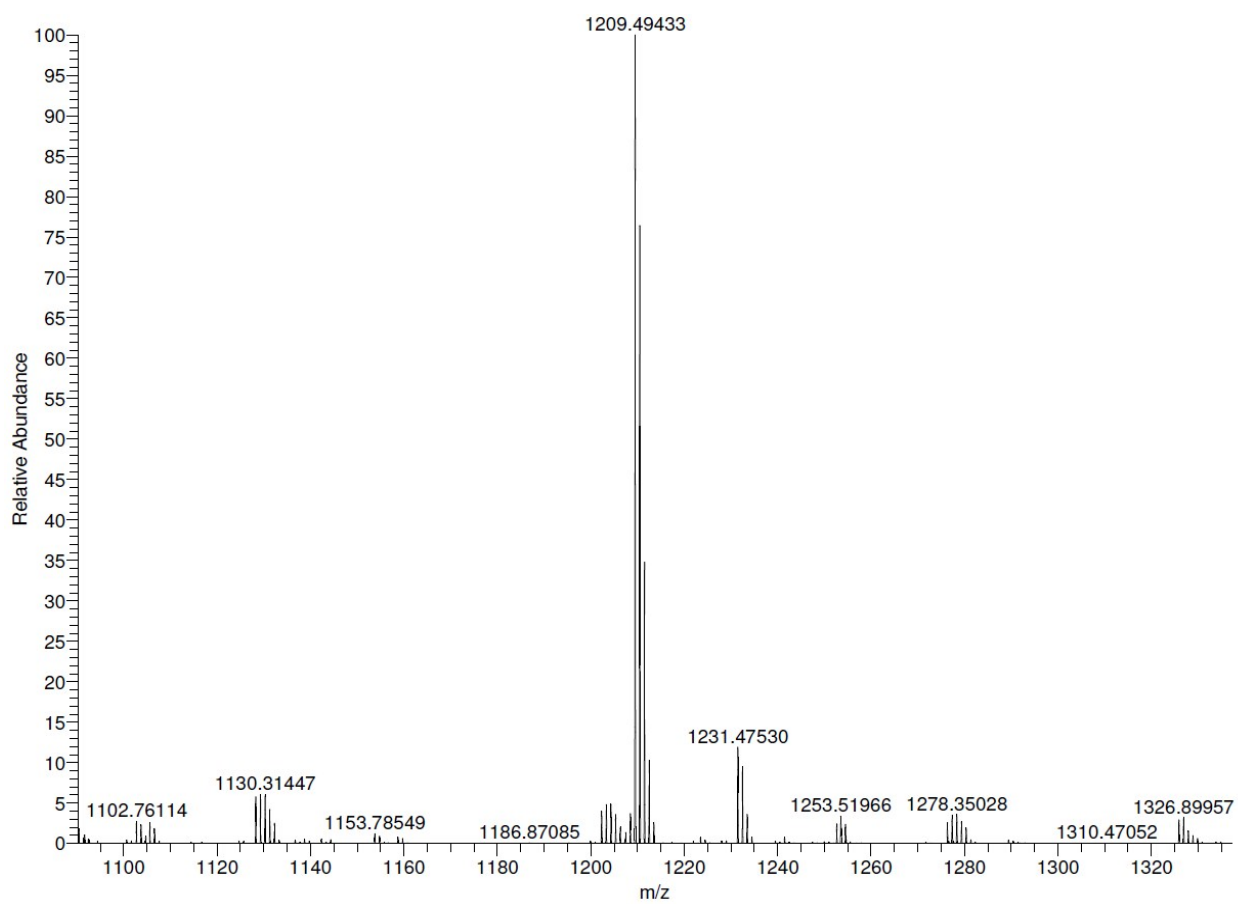

**Figure 15S:** HRMS spectra of SP-SQ-SP (7)
